# Supplementary material
Source: Royal Society of Chemistry journal article supplement (https://www.rsc.org/suppdata/cc/1999/115/808197b.doc)
Supplement: Supplementary file 1 [file 808197b.doc]

**Supplementary data.**

**Experimental:**

Low Temperature NMR studies on Cationic compounds.

General procedure:

The zirconocene complex (0.1 mmol) was dissolved in 0.25 ml of CD2Cl2 and transferred into a pre-cooled (-78 °C) NMR tube. The cation generating agent (0.21 mmol) such as B(C6F5)3 was dissolved in 0.28 ml of CD2Cl2 and transferred on top of the zirconocene solution in the NMR tube. The tube was sealed with a Suba Seal and shaken vigorously to ensure complete mixing. The colour changed to yellow and the sample was inserted into the pre-cooled (-60 °C) spectrometer. 1H, 13 C, HH-COSY and CH-COSY spectra were recorded at -60 °C. The sample was warmed up to ambient temperature in steps of 20K and at each step a 1H NMR spectrum was recorded.

**Preparation of [Zr(-C5H4CMe2-*p*-C6H4Me)2]2+[MeB(C6F5)3]2- 5.**

The compounds [Zr(**-**C5H4CMe2-*p*-C6H4Me)2Me2] (0.83 g, 1.6 mmol) and B(C6F5)3 (1.65 g, 3.2 mmol) were mixed together at -50 C and cold dichloromethane (8ml) was added. The colour changed immediately to dark red. Slow cooling of the reaction mixture to -80 C did not yield suitable crystals for X-ray analysis. A small portion of the reaction mixture was taken and the solvent was removed under reduced pressure to yield a yellow solid. (Analysis(%): Found, C 52.35, H 3.0, Zr 5.8. C68H40F30B2Zr requires: C 53.0, H 2.6, Zr 5.9).

**Preparation of [Zr(-C5H4CMe2Ph)2]2+[MeB(C6F5)3]2- 6.**

The compounds [Zr(-C5H4CMe2Ph)2Me2] (0.183 g, 0.38 mmol) and B(C6F5)3 (0.384 g, 0.76 mmol) were dissolved separately in dichloromethane (2 ml) and the solutions were mixed together at -40 C to yield a clear, yellow solution. The reaction mixture was slowly cooled to -80 C giving yellow crystals which were not suitable for x-ray analysis. (Analysis (%), Found: C 52.2, H 2.95, Zr 5.4. C66H36F30B2Zr requires: C 52.4, H 2.4, Zr 6.0).

Table 1: NMR data for **3**, **4**, **5** and **6**¶

| Compound | 1H NMR (ppm) | assgnt | 13C NMR (ppm) | assgnt | |
| --- | --- | --- | --- | --- | --- |
| [Zr(-C5H4CMe2Ph)2Me2] **3** | -0.24 (s, 6H)a  1.58 (s, 12H)  5.90 (“t”, 4H)  5.98 (“t”, 4H)  7.19-7.27 (m, 10H) | ZrMe  CCH3  Cp’  Cp’  Ph | 29.90b  31.14  39.75  109.68  110.79  125.79  125.99  127.97  137.19  150.60 | C*C*H3  ZrMe  *C*CH3  Cp’  Cp’  *p*-C-Ph  *m*-C-Ph  *o*-C-Ph  *i*-C-Cp  *i*-C-Ph | |
| [Zr(-C5H4CMe2-*p*-C6H4Me)2Me2] **4** | -0.21 (s, 6H)a  1.56 (s, 12H)  2.31 (s, 6H)  5.91 (“t”, 4H)  5.98 (“t”, 4H)  7.10 (“s”, 8H) | ZrMe  CCH3  PhMe  Cp’  Cp’  Ph | 20.84b  29.91  31.06  39.38  109.57  110.14  125.85  128.64  135.23  137.36  147.74 | PhMe  C*C*H3  ZrMe  *C*CH3  Cp’  Cp’  *m*-C-Ph  *o*-C-Ph  *i*-C-PhMe  *i*-C-Cp  *i*-C-Ph | |
| **5** | 0.40 (br, 6H)c  1.70 (br, 12H)  2.59 (s, 6H)  3.70 (s, 2H)  6.19 (s, 2H)  6.58 (s, 2H)  6.69 (d, 2H)  6.78 (s, 2H)  7.40 (d, 2H,  JHH = 7.50 Hz)  8.05 (d, 2H,  JHH = 5.00 Hz)  8.09 (d, 2H,  JHH = 7.50 Hz) | C*H3*B  CMe2  PhMe  Cp4  Cp3  Cp2  Ph2  Cp1  Ph4  Ph1  Ph3 | 9.58d  20.39  23.69  27.96  38.48  108.20  112.21  112.66  118.71  126.20  128.43  131.33  133.25  142.44  142.59  145.10 | *C*H3B  Ph*C*H3  C*C1*H3  C*C2*H3  *C*Me2  Cp3  Cp2  Ph2  Cp1  PhMe  Cp4  Ph4  *i*-C-Cp  Ph1  *i*-C-Ph  Ph3 | |
| **6** | 0.42 (br, 6H)a  1.71 (s, 6H)c  1.73 (s, 6H)c  3.94 (s, 2H)  6.25 (s, 2H)  6.63 (s, 2H)  6.76 (s, 2H)  6.88 (s, 2H)  7.51 (s, 2H)  7.92 (s,2H)  8.24 (s, 2H)  8.33 (s, 2H) | C*H3*B  CC2H3  CC1H3  Cp4  Cp3  Cp2  Ph2  Cp1  Ph4  p-H-Ph  Ph1  Ph3 | 9.65b  23.90  27.69  38.91  108.97  113.37  113.97  119.11  127.61  129.84  130.33  134.10  143.03  144.39  144.58 | | *C*H3B  C*C1*H3  C*C2*H3  *C*Me2  Cp3  Ph2  Cp2  Cp1  Cp4  Ph4  p-C-Ph  *i*-C-Cp  Ph1  *i*-C-Ph  Ph3 |

a CDCl3 300 MHz, 20 C; b CDCl3, 75.5 MHz, 20 C; c CD2Cl2 500 MHz; d CD2Cl2 125.7 MHz, CpHn (n = 1 - 4) denotes hydrogens of the C5 ring, coupled to CpCn (connectivity determined by CH-correlation), PhHn follows analogue.

¶ The chemical shifts for the MeB(C6F5)3- anion are virtually the same in all compounds and are as followed: 19F NMR:  (ppm): -139.39 (d, 6F, *o*-F); -169.52 (t, 3F, *p*-F); -172.36 (t, 6F, *o*-F).
